# Supplementary material for: Aryl Hydrocarbon Receptor Contributes to the Transcriptional Program of IL-10-Producing Regulatory B Cells
Source: PubMed Central journal article supplement (PMC6856759; doi:10.1016/j.celrep.2019.10.018), 2019-11-12
Supplement: mmc1.pdf [file mmc1.pdf]

**Cell Reports, Volume 29**

**Supplemental Information**

**Aryl Hydrocarbon Receptor Contributes  
to the Transcriptional Program  
of IL-10-Producing Regulatory B Cells**

**Christopher J.M. Piper, Elizabeth C. Rosser, Kristine Oleinika, Kiran Nistala, Thomas Krausgruber, André F. Rendeiro, Aggelos Banos, Ignat Drozdov, Matteo Villa, Scott Thomson, Georgina Xanthou, Christoph Bock, Brigitta Stockinger, and Claudia Mauri**

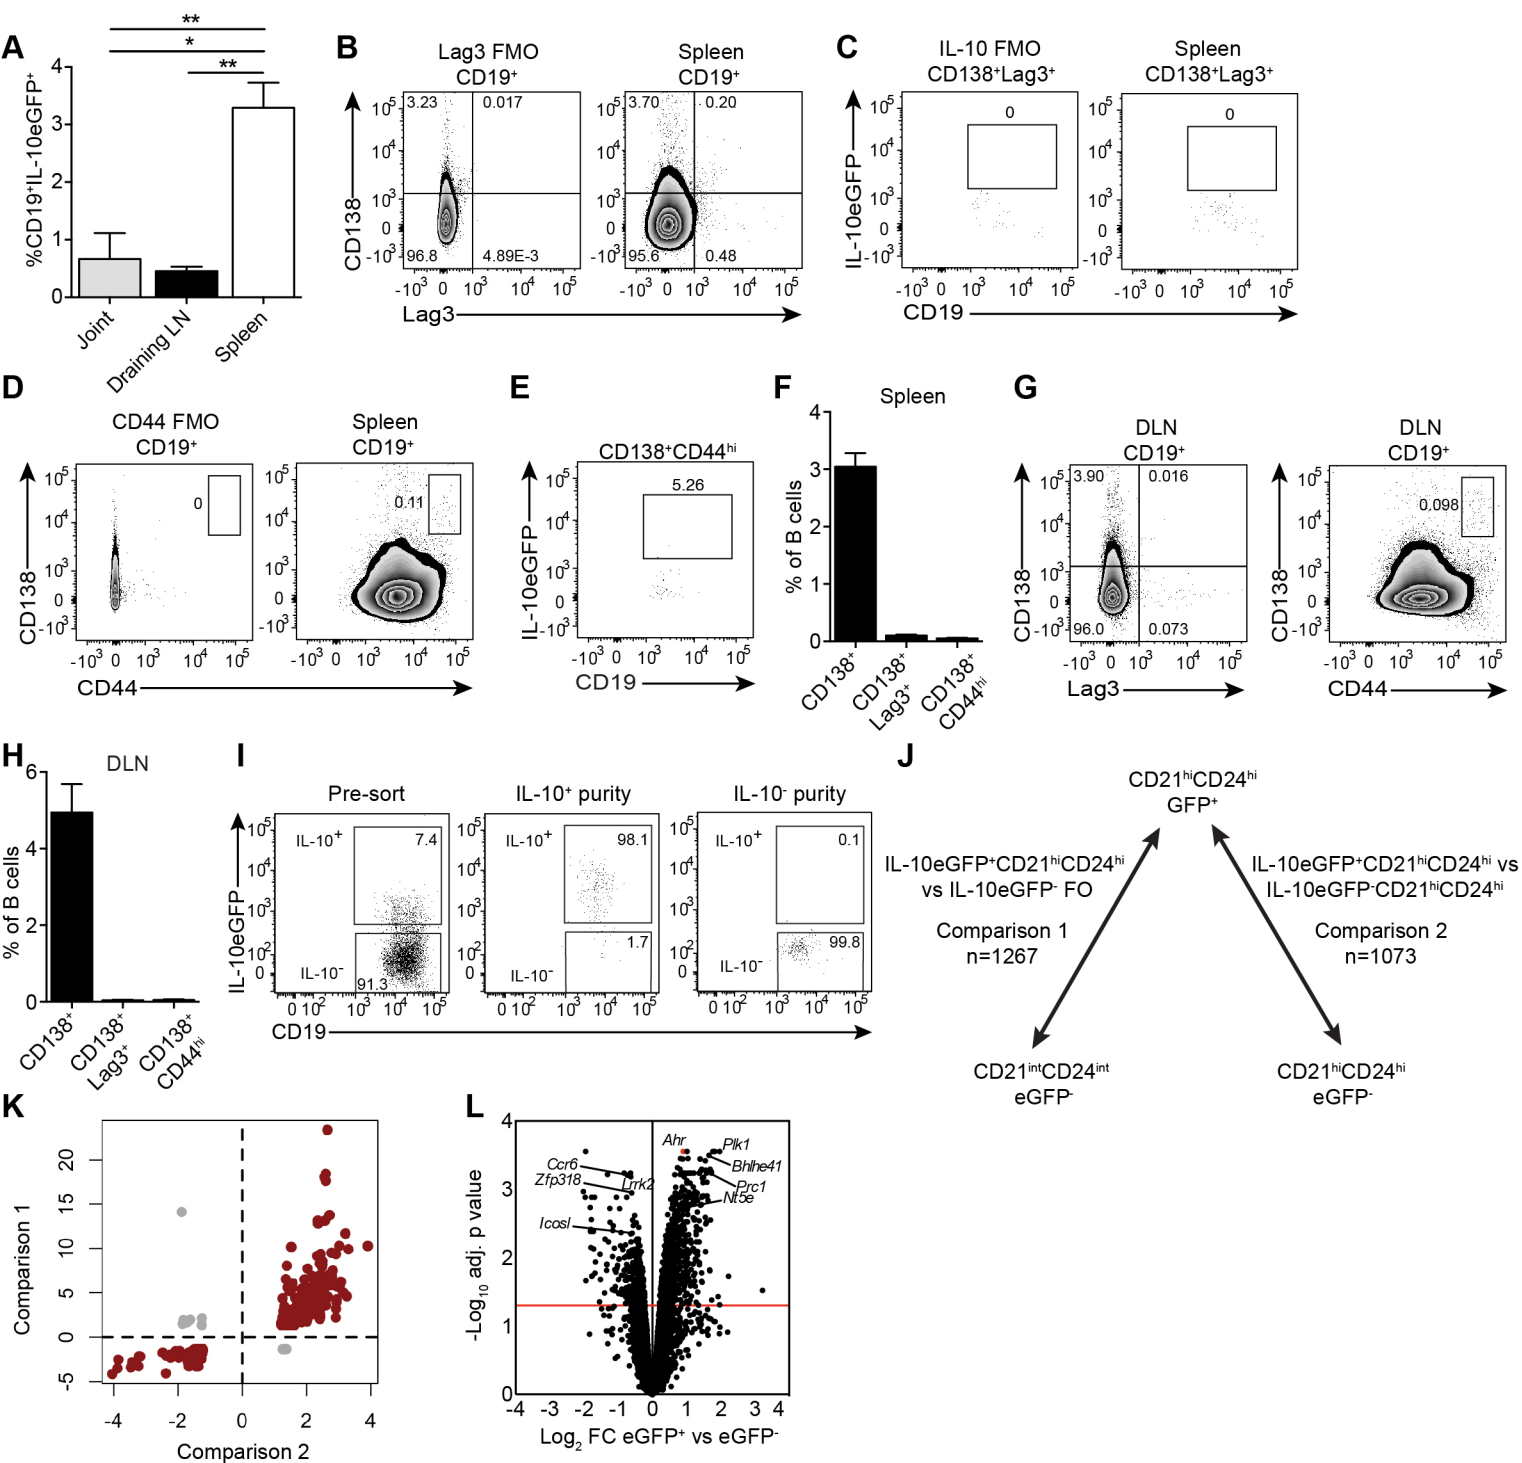

**Figure S1. Comparison of gene expression profiles between eGFP<sup>+</sup> and eGFP<sup>-</sup> subsets. Related to Figures 1 and 2.** Antigen-induced arthritis (AIA) was induced in IL-10eGFP reporter (Vert-X) mice. **(A)** Bar chart showing the frequencies of IL-10<sup>+</sup>CD19<sup>+</sup> B cells in the joint, draining LN and spleens of Vert-X mice ( $n=3$ ). **B-E**, Representative flow cytometry plots showing respectively the frequencies of **(B)** CD138<sup>+</sup>Lag3<sup>+</sup> plasmablasts, **(C)** IL-10<sup>+</sup> CD138<sup>+</sup>Lag3<sup>+</sup>, **(D)** CD138<sup>+</sup>CD44<sup>hi</sup> plasmablasts and **(E)** IL-10<sup>+</sup>CD138<sup>+</sup>CD44<sup>hi</sup> B plasmablasts in the spleen. **(F)** Bar chart showing the percentages of CD19<sup>+</sup>CD138<sup>+</sup>, CD19<sup>+</sup>CD138<sup>+</sup>Lag3<sup>+</sup> and CD19<sup>+</sup>CD138<sup>+</sup>CD44<sup>hi</sup> plasmablasts in the spleens of in Vert-X mice, as shown gated in **B** and **D** ( $n=5$ ). **(G)** Representative flow cytometry plots showing respectively the frequencies of (left) CD138<sup>+</sup>Lag3<sup>+</sup> and (right) CD138<sup>+</sup>CD44<sup>hi</sup> plasmablasts in the DLNs of Vert-X mice. **(H)** Bar chart showing the percentages of CD19<sup>+</sup>CD138<sup>+</sup>, CD19<sup>+</sup>CD138<sup>+</sup>Lag3<sup>+</sup> and CD19<sup>+</sup>CD138<sup>+</sup>CD44<sup>hi</sup> plasmablasts in the DLNs of in Vert-X mice, as shown gated in **G** ( $n=5$ ). **(I)** Representative flow cytometry plots showing purity of CD19<sup>+</sup>CD21<sup>hi</sup>CD24<sup>hi</sup>eGFP<sup>+</sup> and CD19<sup>+</sup>CD21<sup>hi</sup>CD24<sup>hi</sup>eGFP<sup>-</sup> B cells. **(J)** Total number of differentially expressed genes between CD19<sup>+</sup>CD21<sup>hi</sup>CD24<sup>hi</sup>eGFP<sup>+</sup> and IL-10eGFP<sup>-</sup> subsets (>1.5 fold change, adjusted  $p$  value <0.05). **(K)** Scatter plot showing fold changes of differentially expressed genes from the two comparisons ( $n=660$ ). Concordant changes for both comparisons are shown in red, and discordant in grey. **(L)** Volcano plot analysis showing log<sub>2</sub> fold changes (FC) between CD19<sup>+</sup>CD21<sup>hi</sup>CD24<sup>hi</sup>eGFP<sup>+</sup> B cells versus CD19<sup>+</sup>CD21<sup>hi</sup>CD24<sup>hi</sup>eGFP<sup>-</sup> B cells, plotted against -log<sub>10</sub> adjusted  $p$  value. *Ahr* is highlighted in red (adjusted  $p$  value of 3.4E-05). All experiments were carried out at day 7 post IA-injection. For figures **A-H**, data representative of 2 independent experiments. Figures **A**, **F** and **H**, data are expressed as mean±sem. \* $p < 0.05$ , \*\* $p < 0.01$ , one-way ANOVA.

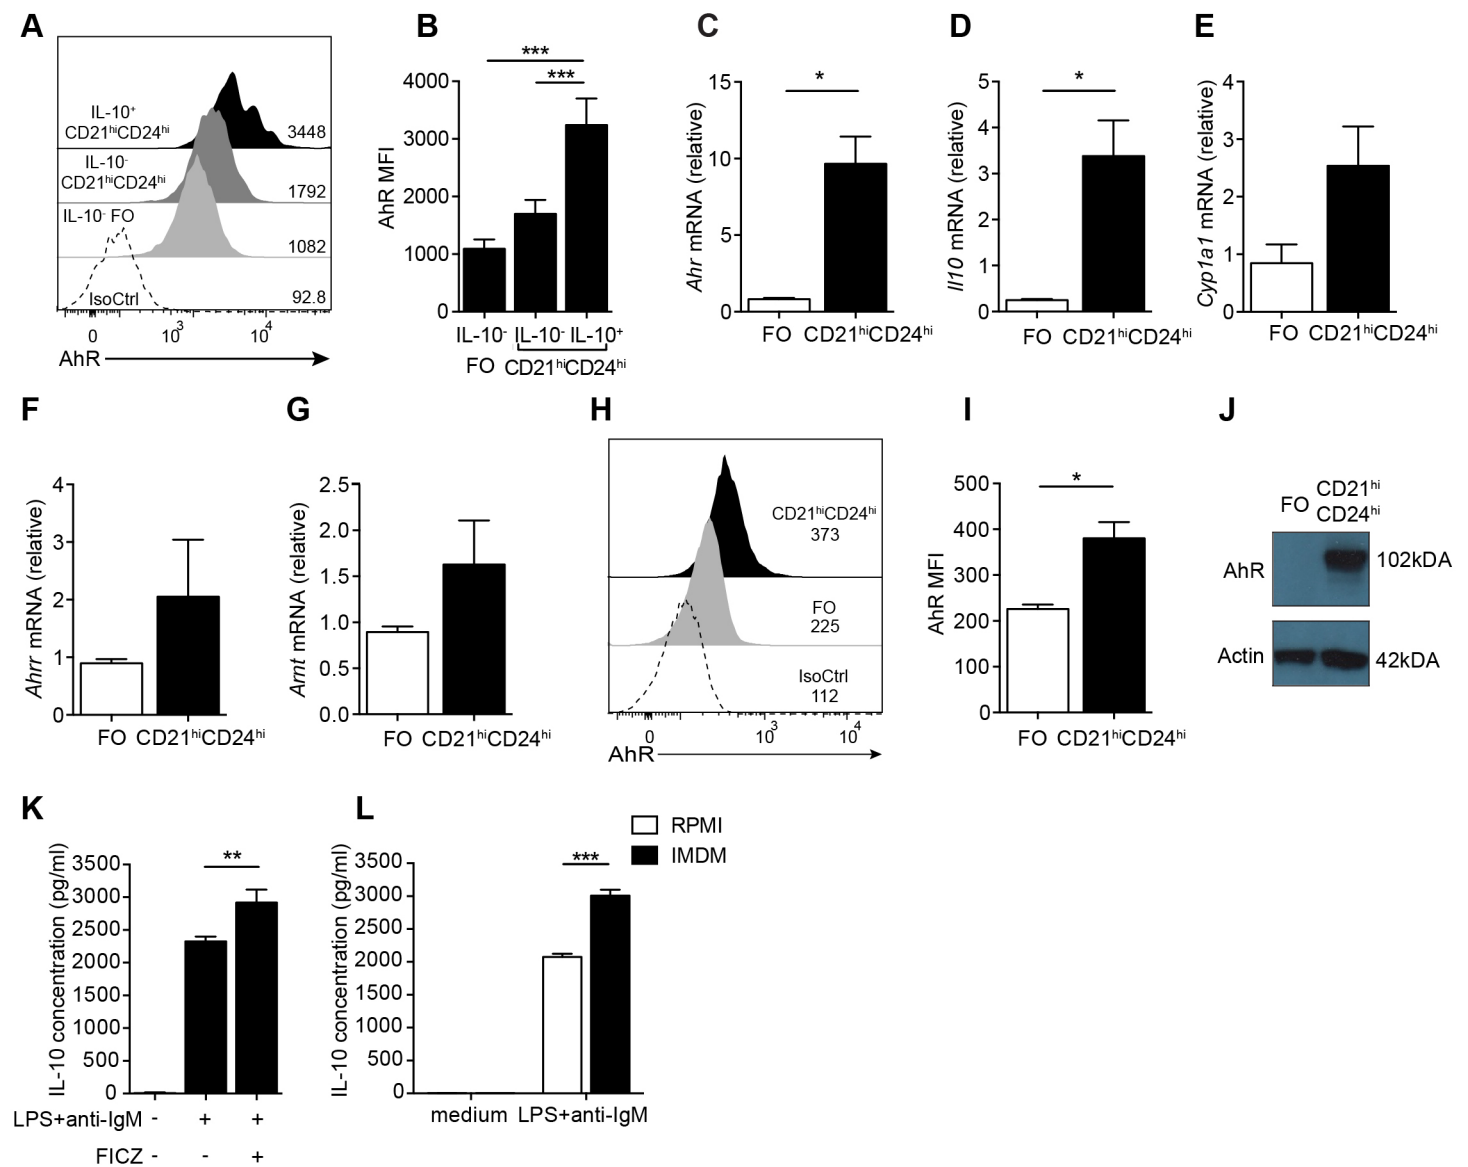

**Figure S2. AhR is upregulated in IL-10<sup>+</sup>CD19<sup>+</sup>CD21<sup>hi</sup>CD24<sup>hi</sup>B cells after stimulation with LPS+anti-IgM. Related to Figure 2 and Figure 3.** (A) Representative histogram and (B) bar chart showing the MFI of AhR expression in IL-10<sup>+</sup>CD19<sup>+</sup>CD21<sup>hi</sup>CD24<sup>hi</sup>, IL-10<sup>-</sup>CD19<sup>+</sup>CD21<sup>hi</sup>CD24<sup>hi</sup> and IL-10<sup>-</sup>FO B cells after 48h stimulation with LPS+anti-IgM (n=4). **C-J, Increased levels of *Ahr* and downstream pathway in *ex vivo* CD19<sup>+</sup>CD21<sup>hi</sup>CD24<sup>hi</sup> compared to FO B cells.** CD19<sup>+</sup>CD21<sup>hi</sup>CD24<sup>hi</sup> and FO B cells were isolated from WT mice and the mRNA levels of (C) *Ahr*, (D) *Il10*, (E) *Cyp1a1*, (F) *Ahr* and (G) *Arnt* were analysed *ex-vivo* (n=3). (H) Representative histogram and (I) bar chart showing the median fluorescent intensity (MFI) of AhR expression in CD19<sup>+</sup>CD21<sup>hi</sup>CD24<sup>hi</sup> and FO B cells *ex vivo* (n=4). (J) Western blot showing the expression of AhR in CD19<sup>+</sup>CD21<sup>hi</sup>CD24<sup>hi</sup> and FO B cells isolated from arthritic WT mice.  $\beta$ -actin was used as a loading control. The numbers indicate the size of the protein bands in kDa. **K-L, AhR agonists increase IL-10 concentration in LPS+anti-IgM stimulated CD19<sup>+</sup>CD21<sup>hi</sup>CD24<sup>hi</sup>B cells.** (K) CD19<sup>+</sup>CD21<sup>hi</sup>CD24<sup>hi</sup>B cells were cultured in RPMI media for 48h with LPS+anti-IgM $\pm$ FICZ and IL-10 was measured in the supernatant (n=4). (L) CD19<sup>+</sup>CD21<sup>hi</sup>CD24<sup>hi</sup>B cells were cultured in LPS+anti-IgM for 48h in RPMI or IMDM media and IL-10 was measured in the supernatants (n=5). For qPCR, gene expression was calculated normalizing to  $\beta$ -Actin. All experiments were carried out at day 7 post IA-injection. Data representative of at least 2 independent experiments with biological replicates. Figures B-G, I and K-L data are expressed as mean $\pm$ sem. \*p<0.05, \*\*p<0.01, \*\*\*p<0.001, one and two-way ANOVA and unpaired t test.

**A**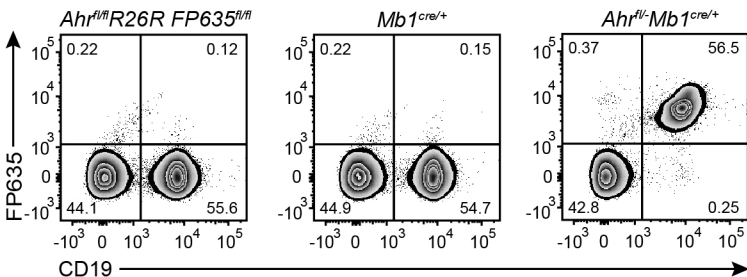**B**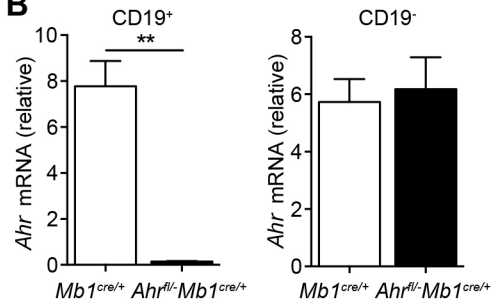

**Figure S3. Validation of B cell AhR deficient (*Ahr<sup>fl/-</sup> Mb1<sup>cre/+</sup>*) mice. Related to Figures 4-6. (A) *Ahr<sup>fl/-</sup> Mb1<sup>cre/+</sup>* mice lack *Ahr* in Mb1-expressing cells and report Cre activity via FP635 expression. Representative flow cytometry plots of FP635 expression in the parental *Ahr<sup>fl/fl</sup> R26R FP635<sup>fl/fl</sup>* strain, *Mb1<sup>cre/+</sup>* control mice and *Ahr<sup>fl/-</sup> Mb1<sup>cre/+</sup>* mice. (B) Splenocytes from *Ahr<sup>fl/-</sup> Mb1<sup>cre/+</sup>* mice and *Mb1<sup>cre/+</sup>* controls were sorted into CD19<sup>+</sup>B220<sup>+</sup> and CD19<sup>-</sup>B220<sup>-</sup> fractions and the levels of *Ahr* mRNA were analysed *ex-vivo* ( $n=3$ ). For qPCR, gene expression was calculated normalizing to  $\beta$ -Actin. All experiments were carried out at day 7 post IA-injection. Data representative of at least 2 independent experiments with biological replicates. Figure B, data are expressed as mean $\pm$ sem. \*\* $p<0.01$ , unpaired t test.**

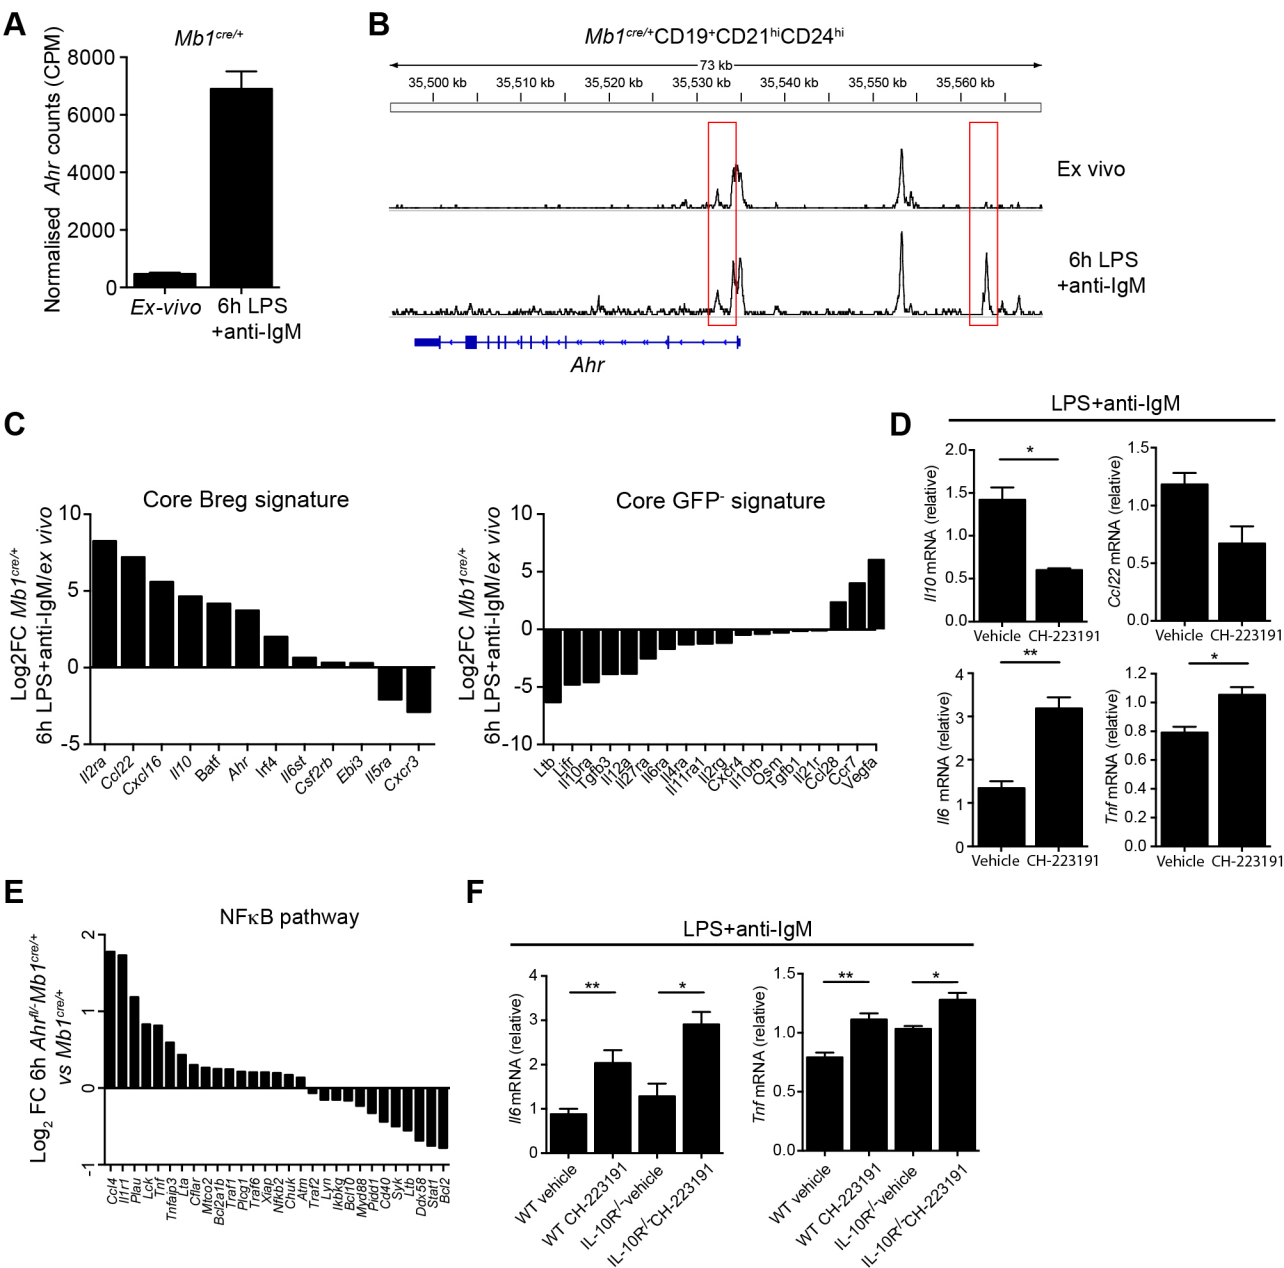

**Figure S4. AhR contributes to the chromatin and transcriptional landscape of CD19<sup>+</sup>CD21<sup>hi</sup>CD24<sup>hi</sup>B cells after Breg priming conditions. Related to Figure 4. (A) Normalised counts (CPM) of *Ahr* expression in *Mb1<sup>cre/+</sup>* mice *ex vivo* and after activation for 6h with LPS+anti-IgM. (B) Representative track of the *Ahr* locus before and after stimulation with LPS+anti-IgM in *Mb1<sup>cre/+</sup>* CD19<sup>+</sup>CD21<sup>hi</sup>CD24<sup>hi</sup> B cells. Red box indicates one significantly differentially accessible region. (C) Log<sub>2</sub> FC for core GFP<sup>+</sup> and GFP<sup>-</sup> gene signatures (identified from Figure 1G) comparing 6h LPS+anti-IgM vs *ex vivo* *Mb1<sup>cre/+</sup>* CD19<sup>+</sup>CD21<sup>hi</sup>CD24<sup>hi</sup>B cells. (D) CD19<sup>+</sup>CD21<sup>hi</sup>CD24<sup>hi</sup>B cells were isolated from WT mice and stimulated for 24h with LPS+anti-IgM in the presence of the AhR antagonist (CH-223191) or a vehicle control and *Il10*, *Ccl22*, *Il6* and *Tnf* mRNA levels were analyzed (*n*=5). (E) Log<sub>2</sub> FC for NF-κB pathway genes (taken from KEGG) comparing 6h LPS+anti-IgM stimulated CD19<sup>+</sup>CD21<sup>hi</sup>CD24<sup>hi</sup>B cells from *Mb1<sup>cre/+</sup>* and *Ahr<sup>fl/-</sup>Mb1<sup>cre/+</sup>* mice. (F) WT or IL-10R<sup>-/-</sup> CD19<sup>+</sup>CD21<sup>hi</sup>CD24<sup>hi</sup>B cells were cultured with LPS+anti-IgM±CH-223191 and *Il6* and *Tnf* mRNA levels were analyzed (*n*=5). For qPCR, gene expression was calculated normalizing to β-Actin. All experiments were carried out at day 7 post IA-injection. For RNA-seq data, *n*=3 per condition and genotype. For ATAC-seq data, *n*=3 for *Mb1<sup>cre/+</sup>* mice and *n*=2 for *Ahr<sup>fl/-</sup>Mb1<sup>cre/+</sup>* mice. Figures A, D and F, data expressed as mean±sem. \**p*<0.05, \*\**p*<0.01, Mann-whitney test and two-way ANOVA. Figures D and F, representative of two independent experiments with biological replicates.**

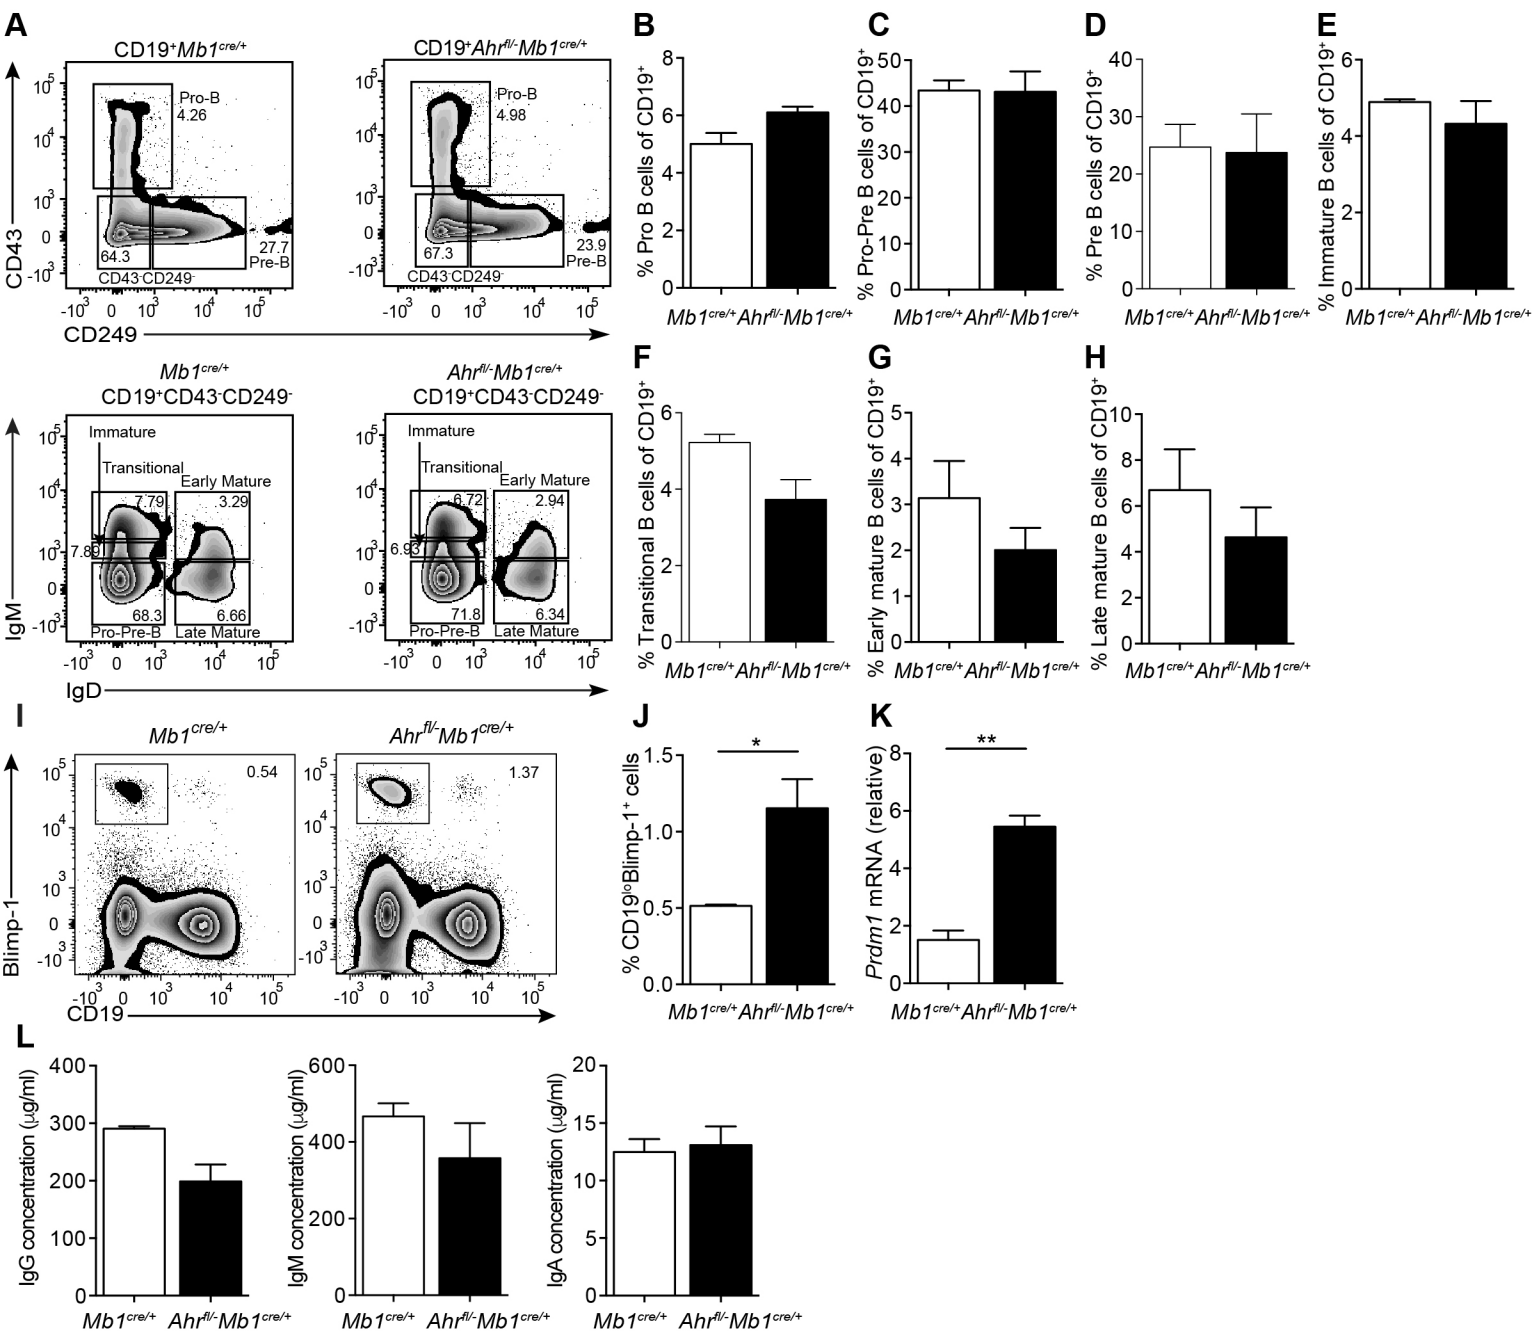

**Figure S5. A-H, AhR plays a redundant role in early B cell development in the bone marrow. Related to Figure 6.** (A) Representative flow cytometry plots showing *Mb1*<sup>cre/+</sup> and *Ahr*<sup>fl/-</sup>*Mb1*<sup>cre/+</sup> B cell subsets in the bone marrow. **B-H**, Bar charts showing the frequencies of (B) pro, (C) pro-pre, (D) pre, (E) immature, (F) transitional (G) early mature and (H) late mature B cells, as a percentage of total CD19<sup>+</sup> B cells in the bone marrow for *Mb1*<sup>cre/+</sup> and *Ahr*<sup>fl/-</sup>*Mb1*<sup>cre/+</sup> mice ( $n=3$  per genotype). **I-K, AhR represses plasma cell differentiation.** (I) Representative flow cytometry plots and (J) bar chart showing the percentage of splenic Blimp-1<sup>+</sup> B cells from *Mb1*<sup>cre/+</sup> and *Ahr*<sup>fl/-</sup>*Mb1*<sup>cre/+</sup> mice ( $n=3$ ). (K) Total splenic B cells were isolated from *Mb1*<sup>cre/+</sup> and *Ahr*<sup>fl/-</sup>*Mb1*<sup>cre/+</sup> mice and *Prdm1* mRNA levels were analysed *ex-vivo* ( $n=3$ ). (L) Serum concentrations of total IgG, IgM and IgA from *Mb1*<sup>cre/+</sup> and *Ahr*<sup>fl/-</sup>*Mb1*<sup>cre/+</sup> mice were measured by ELISA. For qPCR, gene expression was calculated normalizing to  $\beta$ -Actin. All experiments were carried out at day 7 post IA-injection. Data representative of at least 2 independent experiments with biological replicates. Figures **B-H**, and **J-L** data are expressed as mean $\pm$ sem. \* $p<0.05$ , \*\* $p<0.01$ , unpaired t test.

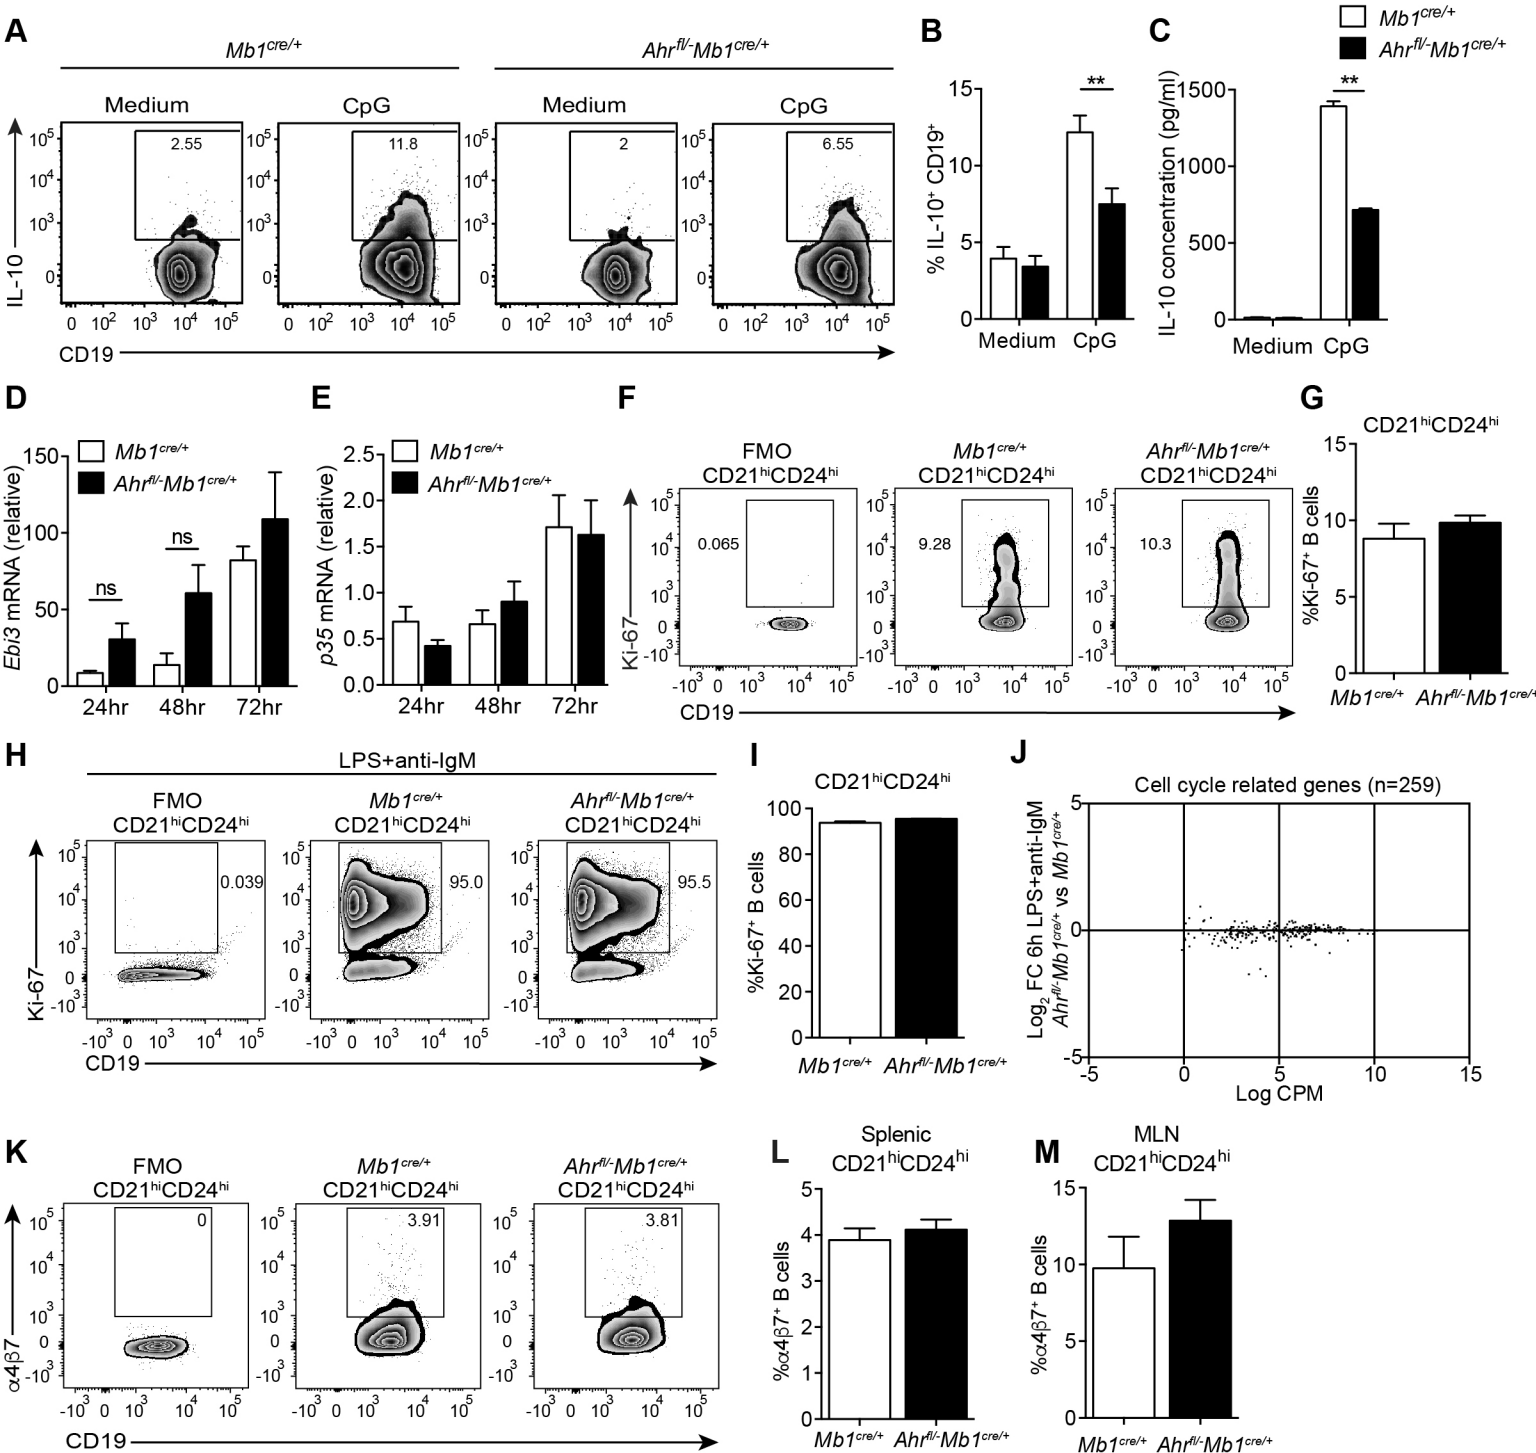

**Figure S6. A-C, AhR is required for IL-10 production by Breg *in vitro*. Related to Figure 6.** Representative flow cytometry plots (A) and bar chart (B) showing the percentage of IL-10-expressing CD19<sup>+</sup>B cells from  $Mb1^{cre/+}$  and  $Ahr^{fl/-}Mb1^{cre/+}$  mice, after 48h stimulation with CpGb ( $n=3$ ). (C) IL-10 production, as measured by ELISA ( $n=3$ ). **D-E, AhR does not control IL-35 production by B cells.** Splenic B cells were isolated from  $Mb1^{cre/+}$  and  $Ahr^{fl/-}Mb1^{cre/+}$  mice and stimulated with LPS for the indicated times and (D) *Ebi3* and (E) *p35* mRNA levels were analysed ( $n=3$ ). **F-J, AhR does not affect the proliferation of CD19<sup>+</sup>CD21<sup>hi</sup>CD24<sup>hi</sup>B cells in arthritic mice.** (F) Representative flow cytometry plots and (G) bar graphs summarising Ki-67 expression in CD19<sup>+</sup>CD21<sup>hi</sup>CD24<sup>hi</sup>B cells from  $Mb1^{cre/+}$  and  $Ahr^{fl/-}Mb1^{cre/+}$  mice *ex vivo* after day 7 AIA and (H-I) after 48h stimulation with LPS+anti-IgM ( $n=3$ ). (J) Volcano plot (RNA-seq analysis) showing log<sub>2</sub> fold changes (FC) between 6h LPS+anti-IgM stimulated CD19<sup>+</sup>CD21<sup>hi</sup>CD24<sup>hi</sup>B cells from  $Ahr^{fl/-}Mb1^{cre/+}$  versus  $Mb1^{cre/+}$  mice, plotted against average log counts per million (CPM; across all samples) for cell cycle related genes ( $n=259$ ). **K-M,  $\alpha 4\beta 7$  is not differentially expressed between  $Mb1^{cre/+}$  and  $Ahr^{fl/-}Mb1^{cre/+}$  CD19<sup>+</sup>CD21<sup>hi</sup>CD24<sup>hi</sup>B cells.** (K) Representative flow cytometry plots of splenic  $\alpha 4\beta 7$  expression in CD19<sup>+</sup>CD21<sup>hi</sup>CD24<sup>hi</sup>B cells from  $Mb1^{cre/+}$  and  $Ahr^{fl/-}Mb1^{cre/+}$  mice. **L-M,** Bar charts showing the frequencies of  $\alpha 4\beta 7$ -expressing CD19<sup>+</sup>CD21<sup>hi</sup>CD24<sup>hi</sup>B cells in the (L) spleen and (M) MLNs of  $Mb1^{cre/+}$  and  $Ahr^{fl/-}Mb1^{cre/+}$  mice ( $n=6$ ). All experiments were carried out at day 7 post IA-injection. For qPCR gene expression was calculated normalising to  $\beta$ -Actin. All data representative of at least 2 independent experiments, with biological replicates. Figures B-E, G, I and L-M, data expressed as mean $\pm$ sem. \*\* $p < 0.01$ , two-way ANOVA.

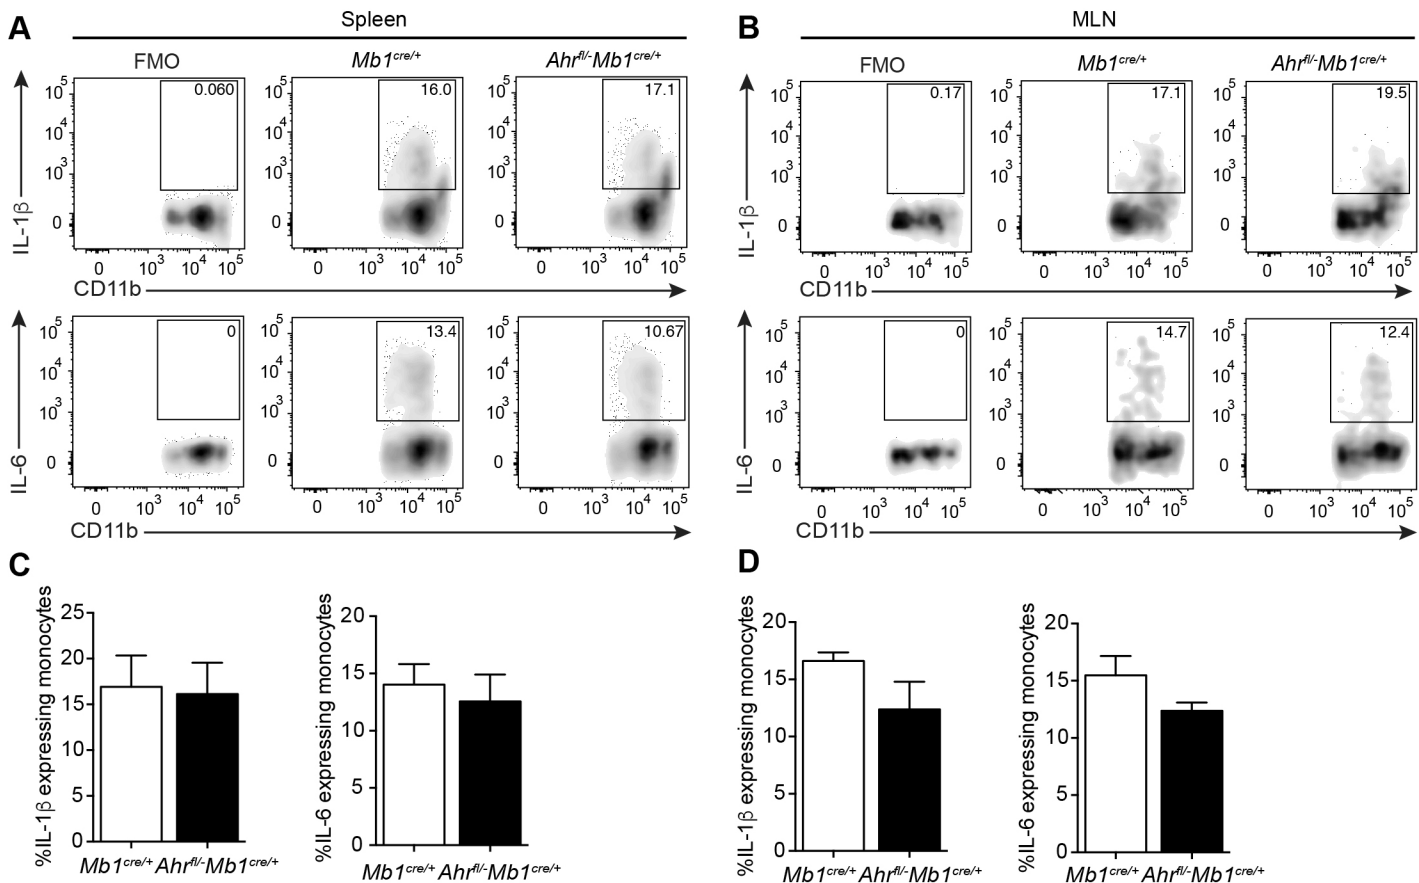

**Figure S7 (Related to Figure 6): A-D, No difference in monocyte IL-1 $\beta$  and IL-6 expression is observed between *Mb1<sup>cre/+</sup>* and *Ahr<sup>fl/-</sup>Mb1<sup>cre/+</sup>* mice.** Total splenocytes or MLN cells were cultured for 6h with LPS. **A-D**, Representative flow cytometry plots and bar charts showing respectively the percentage of **(A,C)** splenic and **(B,D)** MLN IL-1 $\beta$  and IL-6-expressing monocytes ( $n=5$ ). All data representative of at least 2 independent experiments with biological replicates. Figures **C-D**, data expressed as mean $\pm$ sem. \*\* $p<0.01$



| Symbol         | Name                                                  | Function                                                                      | FC<br>(CD21 <sup>hi</sup> CD24 <sup>hi</sup><br>pos vs<br>CD21 <sup>hi</sup> CD24 <sup>hi</sup><br>neg) | adj.P.Val<br>(CD21 <sup>hi</sup> CD24 <sup>hi</sup><br>pos vs<br>CD21 <sup>hi</sup> CD24 <sup>hi</sup><br>neg) | FC<br>(CD21 <sup>hi</sup> CD24 <sup>hi</sup><br>pos vs FO) | adj.P.Val<br>(CD21 <sup>hi</sup> CD24 <sup>hi</sup><br>pos vs FO) |
|----------------|-------------------------------------------------------|-------------------------------------------------------------------------------|---------------------------------------------------------------------------------------------------------|----------------------------------------------------------------------------------------------------------------|------------------------------------------------------------|-------------------------------------------------------------------|
| <i>Ahr</i>     | Aryl-hydrocarbon receptor                             | DNA binding                                                                   | 1.869114565                                                                                             | 5.05135E-05                                                                                                    | 5.183739908                                                | 1.73543E-08                                                       |
| <i>E2f8</i>    | E2F transcription factor 8                            | Core promoter binding                                                         | 3.524122031                                                                                             | 8.24144E-05                                                                                                    | 9.937468163                                                | 1.16556E-07                                                       |
| <i>Bhlhe41</i> | Basic helix-loop-helix family, member e41             | RNA polymerase II core promoter proximal region sequence-specific DNA binding | 3.151182551                                                                                             | 5.20865E-05                                                                                                    | 5.070827978                                                | 2.34121E-07                                                       |
| <i>Pim1</i>    | Proviral integration site 1                           | Nucleotide binding                                                            | 1.43710652                                                                                              | 0.000803313                                                                                                    | 1.536952061                                                | 5.28079E-05                                                       |
| <i>Tacc3</i>   | Transforming, acidic coiled-coil containing protein 3 | Protein binding                                                               | 1.754219566                                                                                             | 0.000237504                                                                                                    | 2.612848846                                                | 1.13543E-06                                                       |
| <i>E2f7</i>    | E2F transcription factor 7                            | Core promoter binding                                                         | 1.569164933                                                                                             | 0.000491558                                                                                                    | 2.089170639                                                | 3.35506E-06                                                       |
| <i>Dnmt1</i>   | DNA methyltransferase (cytosine-5) 1                  | DNA binding                                                                   | 1.525927763                                                                                             | 0.001016079                                                                                                    | 1.542642041                                                | 0.000192334                                                       |
| <i>Zbtb32</i>  | Zinc finger and BTB domain containing 32              | Nucleic acid binding                                                          | 1.564102074                                                                                             | 0.00060818                                                                                                     | 1.599906949                                                | 8.54549E-05                                                       |
| <i>Zfpml</i>   | Zinc finger protein, multitype 1                      | RNA polymerase II core promoter binding transcription factor activity         | 1.635156815                                                                                             | 0.000956596                                                                                                    | 2.073406035                                                | 1.36055E-05                                                       |
| <i>Pmfl</i>    | Polyamine-modulated factor 1                          | Transcription coactivator activity                                            | 1.613117282                                                                                             | 0.000743998                                                                                                    | 2.03500123                                                 | 9.61821E-06                                                       |
| <i>Clqbp</i>   | C1q binding protein                                   | Complement component C1q binding                                              | 1.49365815                                                                                              | 0.002166338                                                                                                    | 1.796509212                                                | 4.16981E-05                                                       |
| <i>Foxm1</i>   | Forkhead box M1                                       | DNA binding                                                                   | 1.457277204                                                                                             | 0.00190059                                                                                                     | 2.20317842                                                 | 3.01442E-06                                                       |

|                 |                                                                            |                                    |              |             |              |             |
|-----------------|----------------------------------------------------------------------------|------------------------------------|--------------|-------------|--------------|-------------|
| <i>Cenpf</i>    | Centromere protein F                                                       | Protein C-terminus binding         | 1.922637351  | 0.008852351 | 3.81234672   | 2.613E-05   |
| <i>Pdlim1</i>   | PDZ and LIM domain 1 (elfin)                                               | Transcription coactivator activity | 1.538439454  | 0.001738439 | 1.372627344  | 0.00277832  |
| <i>Setd8</i>    | SET domain containing (lysine methyltransferase) 8                         | P53 binding                        | 1.481768428  | 0.005872492 | 1.58624982   | 0.000660724 |
| <i>E2f1</i>     | E2F transcription factor 1                                                 | Core promoter binding              | 1.27720107   | 0.005234129 | 1.799717751  | 4.40902E-06 |
| <i>Hes6</i>     | Hairy and enhancer of split 6                                              | DNA binding                        | 1.26830407   | 0.004558499 | 1.367381679  | 0.000227666 |
| <i>Smarca4</i>  | SWI/SNF related, matrix associated, actin dependent regulator of chromatin | Nucleotide binding                 | 1.335143927  | 0.011950492 | 1.398775214  | 0.00168523  |
| <i>Dip2c</i>    | DIP2 disco-interacting protein 2 homolog C (Drosophila)                    | Unknown                            | 1.258003811  | 0.02122796  | 1.734098658  | 2.86597E-05 |
| <i>Skil</i>     | SKI-like                                                                   | Chromatin binding                  | -1.201268078 | 0.022180352 | -1.54986752  | 3.18895E-05 |
| <i>Hhex</i>     | Hematopoietically expressed homeobox                                       | DNA binding                        | -1.235422164 | 0.026407274 | -1.511651527 | 0.000170022 |
| <i>Rbpms</i>    | RNA binding protein gene with multiple splicing                            | Nucleotide binding                 | -1.326003662 | 0.040745097 | -1.992794467 | 7.70317E-05 |
| <i>Hist1h4k</i> | Histone Cluster 1 H4 Family Member K                                       | Unknown                            | 1.274        | 0.019929    | 1.5213       | 0.00027     |

**Table S1 (Related to Figure 2):** List of 23 candidate genes differentially expressed between CD21<sup>hi</sup>CD24<sup>hi</sup>IL-10eGFP<sup>+</sup> and GFP<sup>-</sup> populations. Abbreviations: FC – fold change, FO – Follicular.

| Resource                         | Source                                               | Identifier     |
|----------------------------------|------------------------------------------------------|----------------|
| <b>qPCR primers</b>              |                                                      |                |
| <b><i>Actb</i></b>               | ThermoFisher Scientific; This paper                  | N/A            |
| Fwd 5'-AGATGACCCAGATCATGTTTGAG   |                                                      |                |
| Rev 5'-AGGTCCAGACGCAGGATG        |                                                      |                |
| <b><i>Ahr</i></b>                | ThermoFisher Scientific; This paper                  | N/A            |
| Fwd 5'-AGGATCGGGGTACCAGTTCA-3'   |                                                      |                |
| Rev 5'-CTCCAGCGACTGTGTTTTGC-3'   |                                                      |                |
| <b><i>Ahrr</i></b>               | Qiagen                                               | Cat#QT00161693 |
| N/A                              |                                                      |                |
|                                  |                                                      |                |
| <b><i>Arnt</i></b>               | Qiagen                                               | Cat#QT00151718 |
| N/A                              |                                                      |                |
|                                  |                                                      |                |
| <b><i>Ccl22</i></b>              | ThermoFisher Scientific; Hao <i>et al.</i> , 2016    | N/A            |
| Fwd 5'-CAGGCAGGTCTGGGTGAA-3'     |                                                      |                |
| Rev 5'-TAAAGGTGGCGTCGTTGG-3'     |                                                      |                |
| <b><i>Cyp11a1</i></b>            | Qiagen                                               | Cat#QT00105756 |
| N/A                              |                                                      |                |
|                                  |                                                      |                |
| <b><i>Ebi3</i></b>               | ThermoFisher Scientific; Shen <i>et al.</i> , 2014   | N/A            |
| CGGTGCCCTACATGCTAAAT             |                                                      |                |
| GCGGAGTCGGTACTTGAGAG             |                                                      |                |
| <b><i>Il2</i></b>                | ThermoFisher Scientific; Martins., 2008              | N/A            |
| 5'-AGCAGCTGTTGATGGACCTA-3'       |                                                      |                |
| 5'-CGCAGAGGTCCAAGTTCAT-3'        |                                                      |                |
| <b><i>Il5ra</i></b>              | ThermoFisher Scientific; This paper                  | N/A            |
| Fwd 5'-GGTCCCGGTATGCAGTTCTA-3'   |                                                      |                |
| Rev 5'-AGCCGAATGCTGGAAAAGTG-3'   |                                                      |                |
| <b><i>Il6</i></b>                | ThermoFisher Scientific; This paper                  | N/A            |
| Fwd 5'-GCCTTCTTGGGACTGATGCT-3'   |                                                      |                |
| Rev 5'-TGCCATTGCACAACCTCTTTTC-3' |                                                      |                |
| <b><i>Il10</i></b>               | ThermoFisher Scientific; Yanaba <i>et al.</i> , 2009 | N/A            |
| Fwd 5'-GGTTGCCAAGCCTTATCGGA-3'   |                                                      |                |
| Rev 5'-ACCTGCTCCACTGCCTTGCT-3'   |                                                      |                |
| <b><i>p35</i></b>                | ThermoFisher Scientific; Shen <i>et al.</i> , 2014   | N/A            |
| Fwd 5'-CATCGATGAGCTGATGCAGT-3'   |                                                      |                |
| Rev 5'-CAGATAGCCCATCACCTGT-3'    |                                                      |                |
| <b><i>Tnf</i></b>                | ThermoFisher Scientific; Denaes <i>et al.</i> , 2016 | N/A            |
| Fwd 5'-AATGGCCTCCCTCTCATCAGTT-3' |                                                      |                |
| Rev 5'-CCACTTGGTGGTTTGCTACGA-3'  |                                                      |                |
| <b>ChIP qPCR primers</b>         |                                                      |                |

|                                     |                                     |     |
|-------------------------------------|-------------------------------------|-----|
| <b><i>Il10</i> -3.5kb</b>           | ThermoFisher Scientific; This paper | N/A |
| Fwd 5'-AGGGCTTGATAACGTGTGAGT-3'     |                                     |     |
| Rev 5'-TGAACCTTCACACCCAGCTTGAG-3'   |                                     |     |
| <b><i>Il10</i> -2kb</b>             | ThermoFisher Scientific; This paper | N/A |
| Fwd 5'-TAAGAGGTGCTGCTTCTCCTG-3'     |                                     |     |
| Rev 5'-TGGCACTGGACAGTTCTATGA-3'     |                                     |     |
| <b><i>Il10</i> -0.5kb</b>           | ThermoFisher Scientific; This paper | N/A |
| Fwd 5'-AGGGAGGAGGAGCCTGAATAA-3'     |                                     |     |
| Rev 5'-CCTGTTCTTGGTCCCCCTTTT-3'     |                                     |     |
| <b><i>Il10</i> +2kb</b>             | ThermoFisher Scientific; This paper | N/A |
| Fwd 5'-GCCACATGCATCCAGAGACAC-3'     |                                     |     |
| Rev 5'-GTGCCTCAAAGTCACTCCAC-3'      |                                     |     |
| <b><i>Cyp11a1</i> -3.6kb</b>        | ThermoFisher Scientific; This paper | N/A |
| Fwd 5'-GCTCTTTCTCTGCCAGGTTG-3'      |                                     |     |
| Rev 5'-GGCTAAGGGTCACAATGGAA-3'      |                                     |     |
| <b><i>Cyp11a1</i> promoter</b>      | ThermoFisher Scientific; This paper | N/A |
| Fwd 5'-AAGCATCACCTTTGTAGCC-3'       |                                     |     |
| Rev 5'-CAGGCAACACAGAGAAGTCG-3'      |                                     |     |
| <b><i>Gapdh</i> promoter</b>        | ThermoFisher Scientific; This paper | N/A |
| Fwd 5'-GCGCGAAAGTAAAGAAAGAAGCCC-3'  |                                     |     |
| Rev 5'-AGCGGCCCGGAGTCTTAAGTATTAG-3' |                                     |     |

**Table S2. qPCR and ChIP qPCR primers used in this study.** Related to the Key Resources Table in STAR methods. N/A – not applicable.
